# Supplementary material for: Knowledge, attitude and perception of complementary and alternative system of medicine in Tamilnadu and Pudhucherry, South India
Source: publisher site journal article supplement (doi:10.1515/jcim-2020-0194), 2021-05-06
Supplement: Supplementary file 1 [file j_jcim-2020-0194_suppl.docx]

**Interview Schedule**

**Socio-demographic details:**

1. Name:
2. Age:
3. Sex:
4. Education: Illiterate / primary / secondary / higher secondary / diploma / graduate & above
5. Occupation: Agriculture / labour / service / business / any other (specify)____________
6. Religion: Hindu / Christian / Muslim / anyother (specify)____________
7. Caste: OC / BC / MBC / SC / ST
8. Income per month:
9. No. Of family members:
10. Per capita income:
11. Family structure: Nuclear / Joint
12. Type of house: Kacha / Pucca / Semi pucca
13. Mother tongue: Tamil / Telugu / Hindi / Malayalam / any other (specify)_____________

**Knowledge about alternative therapies:**

1. Which of the following systems of alternate medicines, have you heard about?
2. Ayurveda
3. Siddha
4. Naturopathy
5. Yoga
6. Unani
7. Homeopathy
8. None
9. Are you familiar with any of these systems?

Yes / No if yes, mention the name______________

Since when are you familiar?

1. Less than a year
2. 2-5 years
3. More than 5 years
4. In your opinion which of the following are considered as limitations of these systems?
5. Time consuming
6. No follow up
7. Poor accessibility
8. Side effects
9. Expensive
10. Others (specify)______________
11. Which of the following do you feel as advantages in these systems?
12. No side effects
13. Low chemicals
14. Can be used as home remedies
15. Low cost
16. Others (specify)_______________
17. Are there any government / private AYUSH clinics in your locality?

Yes / No if yes, specify and mention the system_______________

How many?______________ Since when?______________

**Attitude towards Alternative medicines**

1. Do you feel these therapies are effective?

Yes / No, if yes, why?____________

For what conditions?

1. All
2. Chronic diseases
3. Acute diseases
4. Others, specify_____________
5. Do you prefer to approach these clinics?

Yes / No, if yes, for which conditions________________

1. Do you wish to have more AYUSH centres in your locality?

Yes / No

1. Your opinion about combination of all therapies in providing medical care in a single hospital setting?
2. Strongly approve
3. Approve
4. Neutral
5. Disapprove
6. Strongly disapprove

Why?______________

**Perception for practice of Alternate medicine**

1. Have you undergone treatments in any alternative systems of medicine (AYUSH)?

Yes / No

1. If yes, for what condition (specify)_____________

Duration of treatment (specify)_______________

Type of system (specify)_____________________

Result of the treatment:

1. Cured
2. Partially cured
3. Not cured

Explain the course of the treatment____________

1. Have your family members / friends ever undergone treatment in AYUSH?

Yes / No

1. If yes, for what condition (specify)_____________

Duration of treatment (specify)_______________

Type of system (specify)_____________________

Result of the treatment:

1. Cured
2. Partially cured
3. Not cured
4. Explain the course of the treatment__________
5. Do you follow any home remedial measure?

Yes / No if yes, mention them__________________

1. If yes, mention the source of the home remedies
2. Friends
3. Relatives
4. Neighbours
5. Medical practitioners (Allopathy / Alternate medical practioner)
6. Any other (specify)____________
7. Do you follow any alternative therapies presently?

Yes / No if yes,

For what condition____________

Since when_____________

1. Do you follow them regularly?

Yes / No

Explain about the treatment_____________
